# Supplementary material for: Dynamic host immune response in virus-associated cancers
Source: PubMed Central journal article supplement (PMC6430765; doi:10.1038/s42003-019-0352-3), 2019-03-22
Supplement: 42003_2019_352_MOESM1_ESM.pdf [file 42003_2019_352_MOESM1_ESM.pdf]

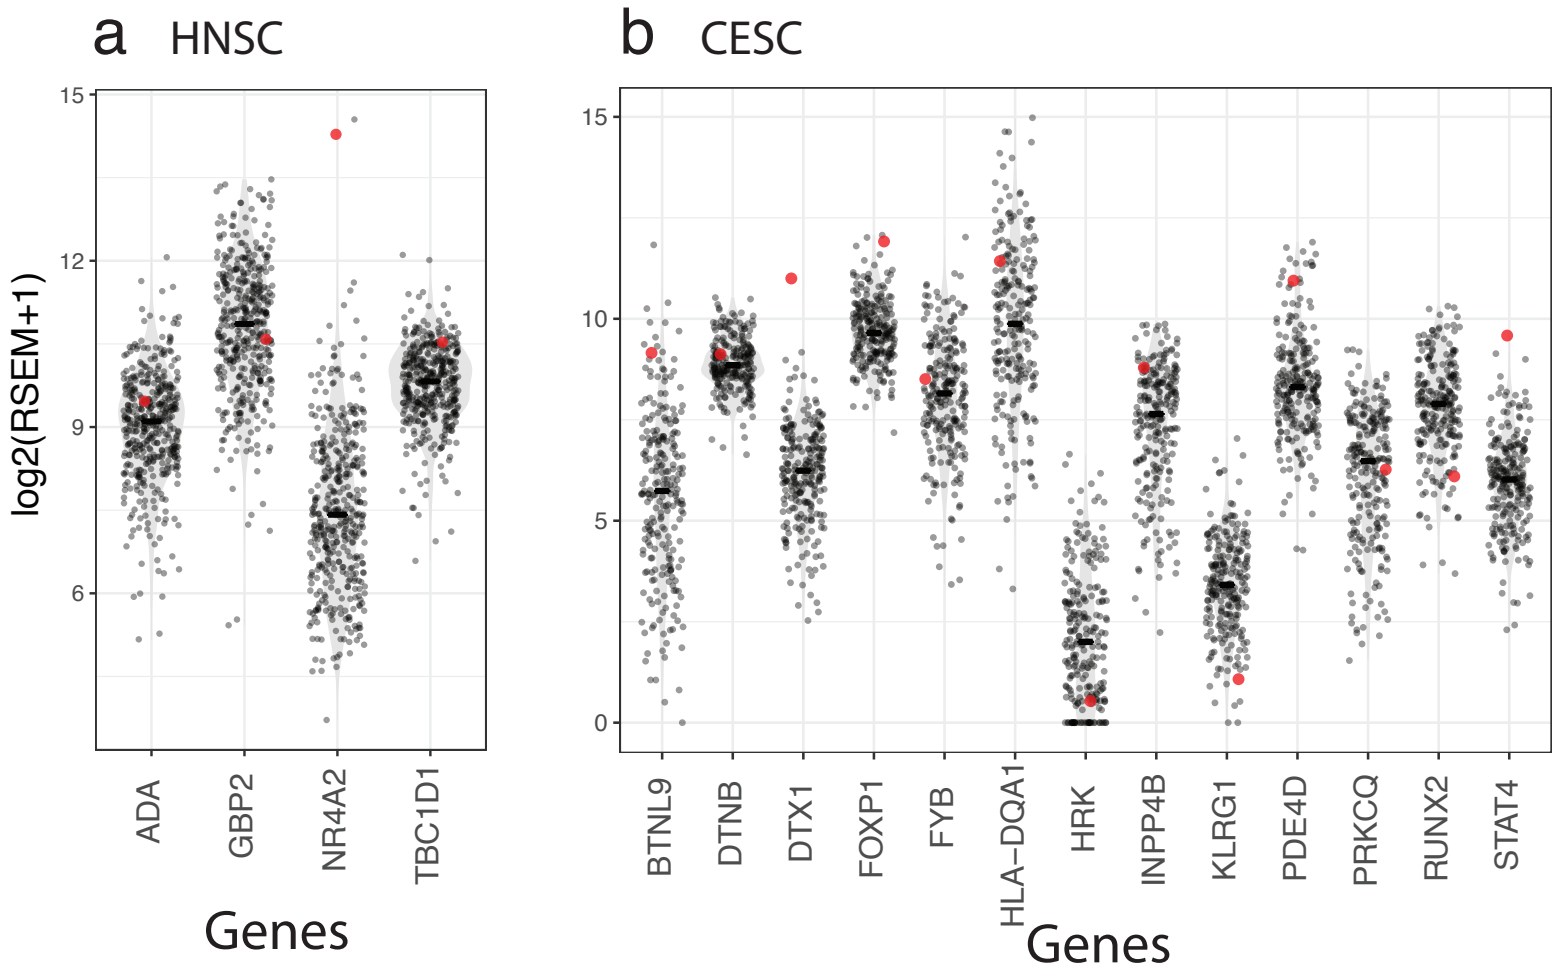

Supplementary Figure 1: Expression of T-Cell and B-Cell genes with and without HPV integrations in (a) HNSC and (b) CESC. Dots marked by Red indicate samples HPV integrations.

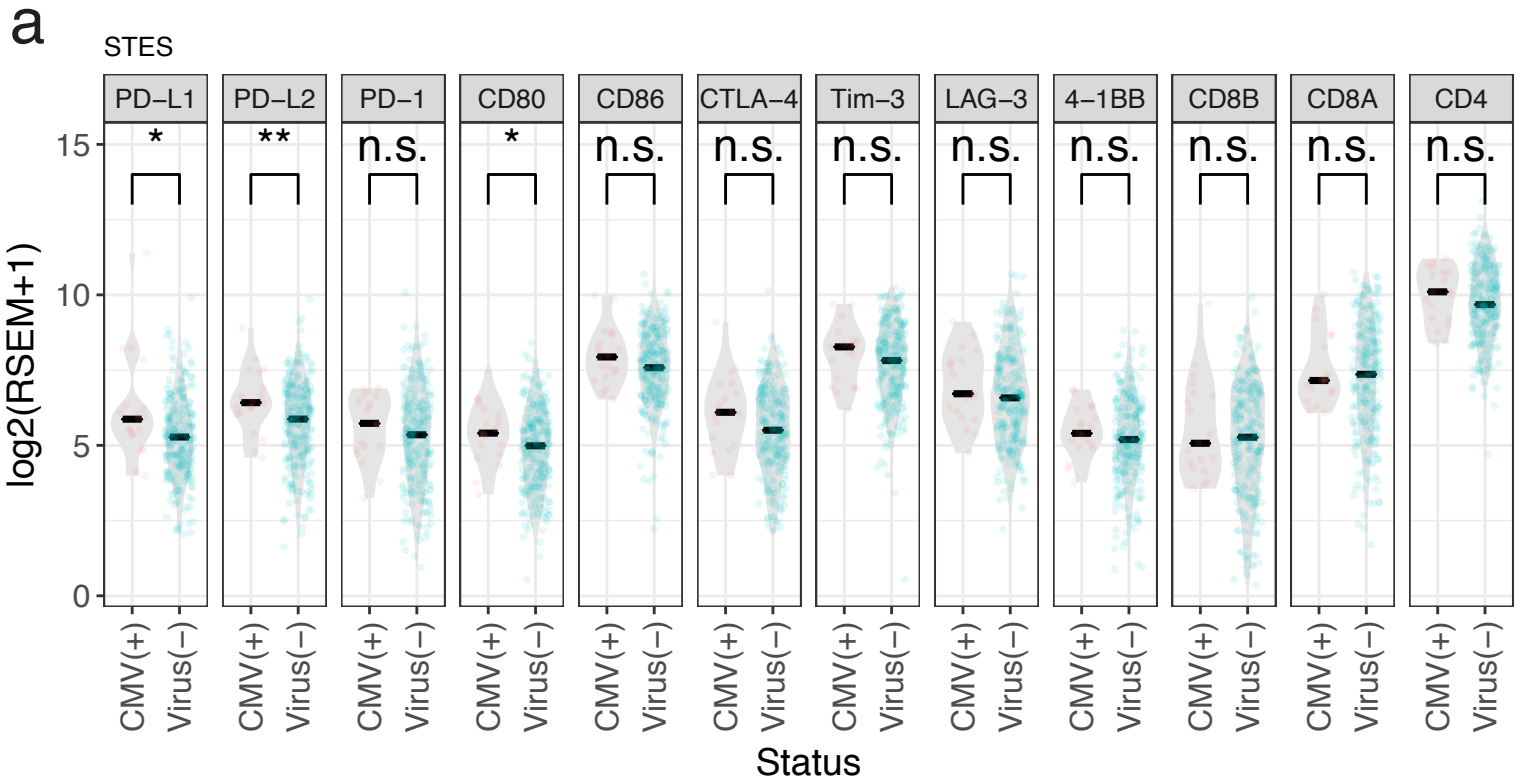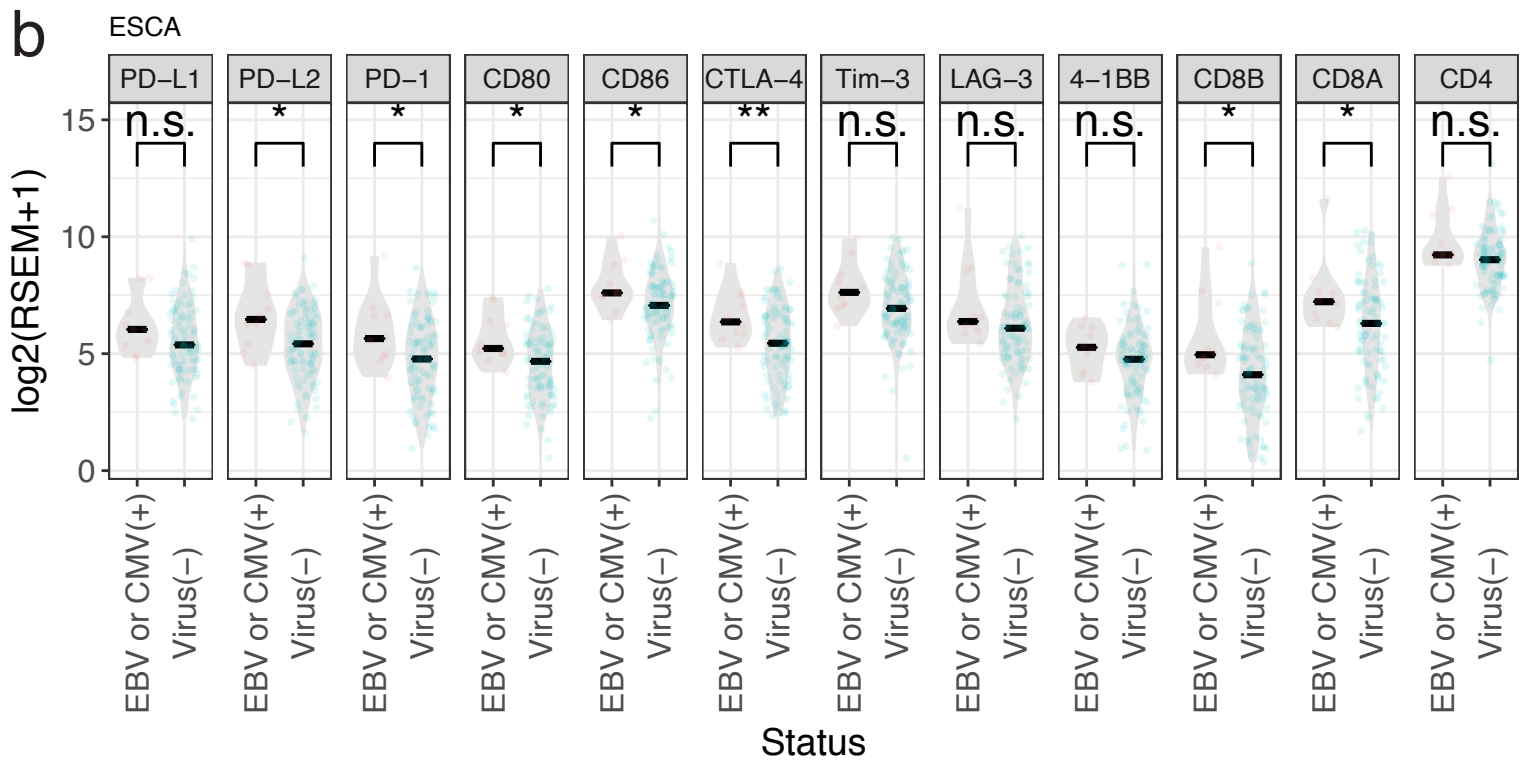

Supplementary Figure 2: The comparison of *PD-L1*, *PD-L2*, *PD-1*, *CD80*, *CD86*, *CTLA-4*, *TIM-3*, *LAG-3*, *4-1BB*, *CD8B*, *CD8A*, and *CD4* expressions in (a) CMV-positive and negative STES tumors and (b) EBV or CMV positive and negative ESCA tumors.

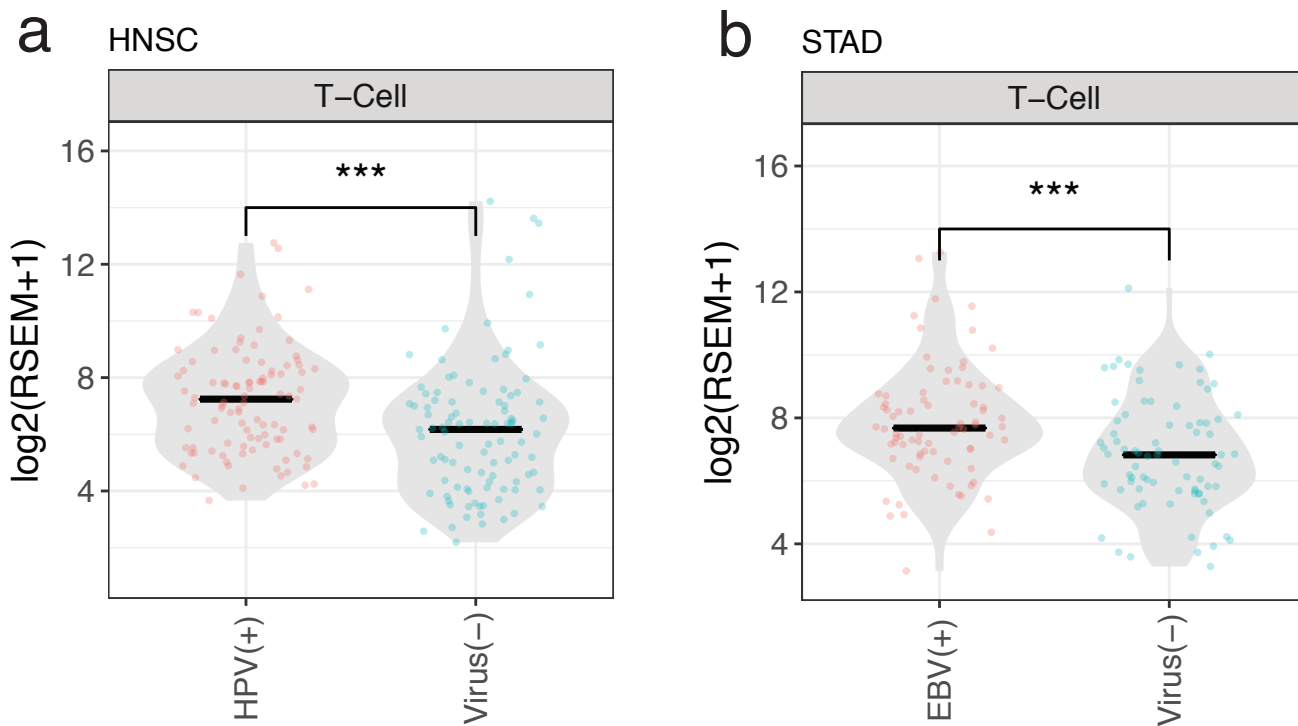

Supplementary Figure 3: The comparison of medians of differentially expressed T-Cell genes in Fig. 3a and b between (a) HPV+ and virus-HNSC tumors, and (b) EBV+ and virus- STAD tumors.

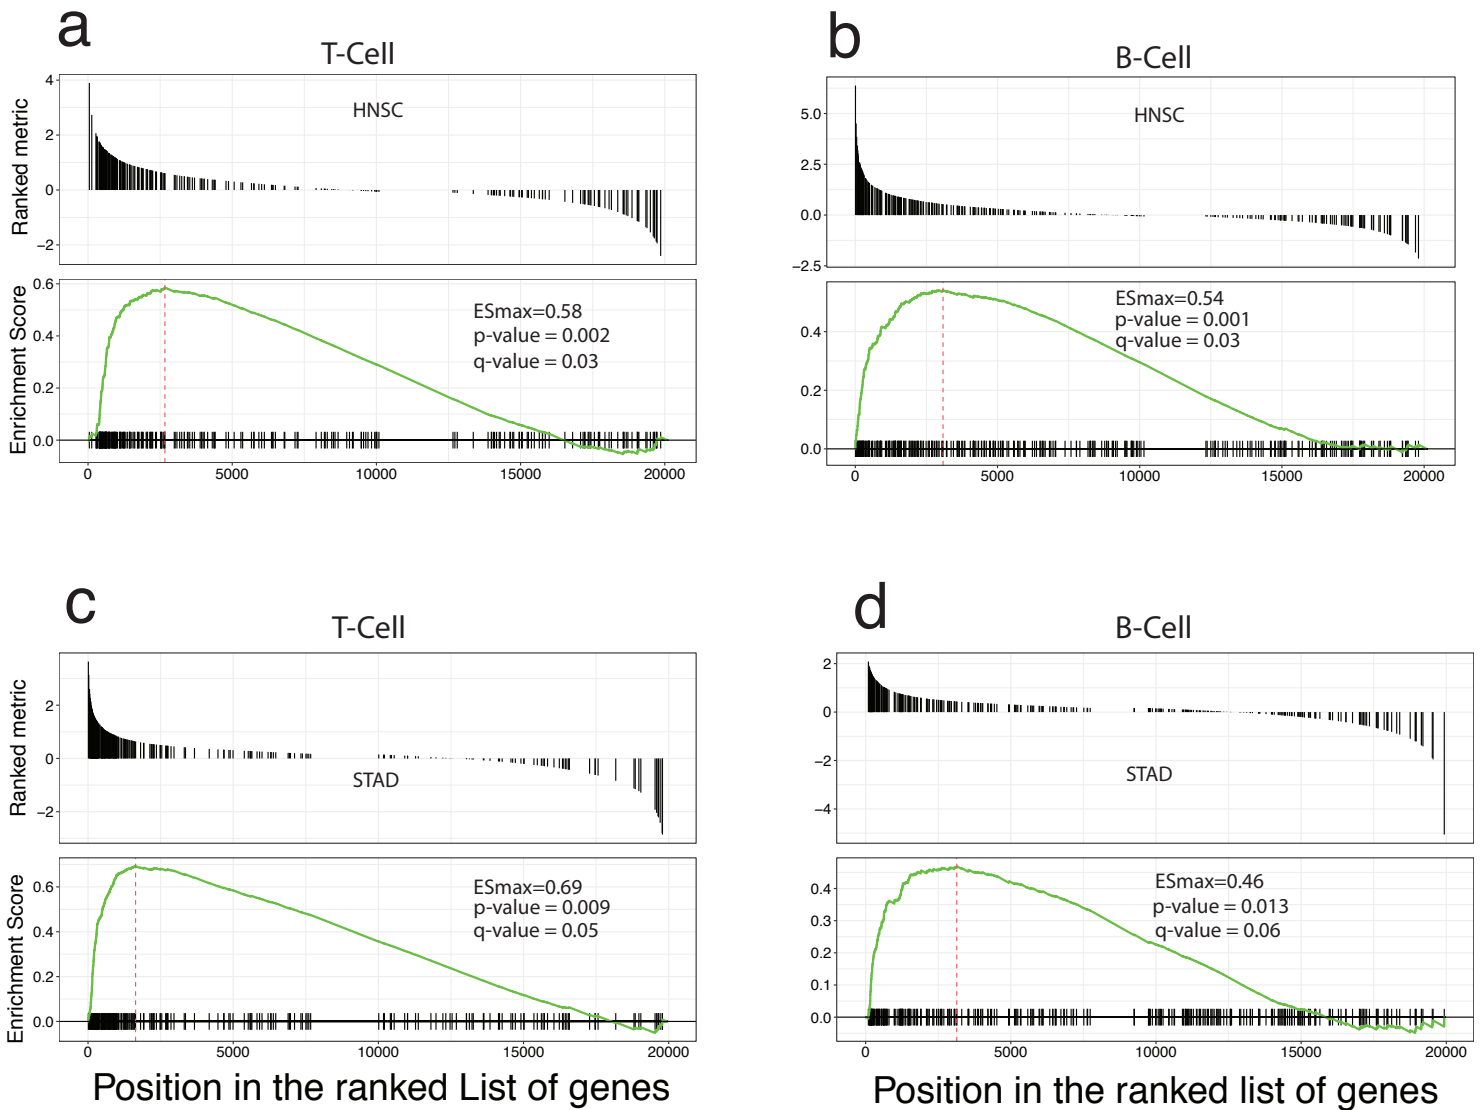

Supplementary Figure 4: GSEA analysis of T-Cell and B-Cell gene sets (a) and (b) in HPV-positive HNSC tumors against virus-negative tumors, (c) and (d) in EBV-positive STAD tumors against virus-negative tumors. In the analysis, we use the difference of medians of the expressions of T-Cell and B-Cell genes (in log<sub>2</sub> scale) between HPV-positive or EBV-positive samples and virus-negative samples as ranked metric.

We found an enrichment of T-Cell and B-Cell gene sets in HPV-positive and EBV-positive samples with significant p-value and q-value below or close 0.05.



# GO annotation of differentially expressed T-Cell genes

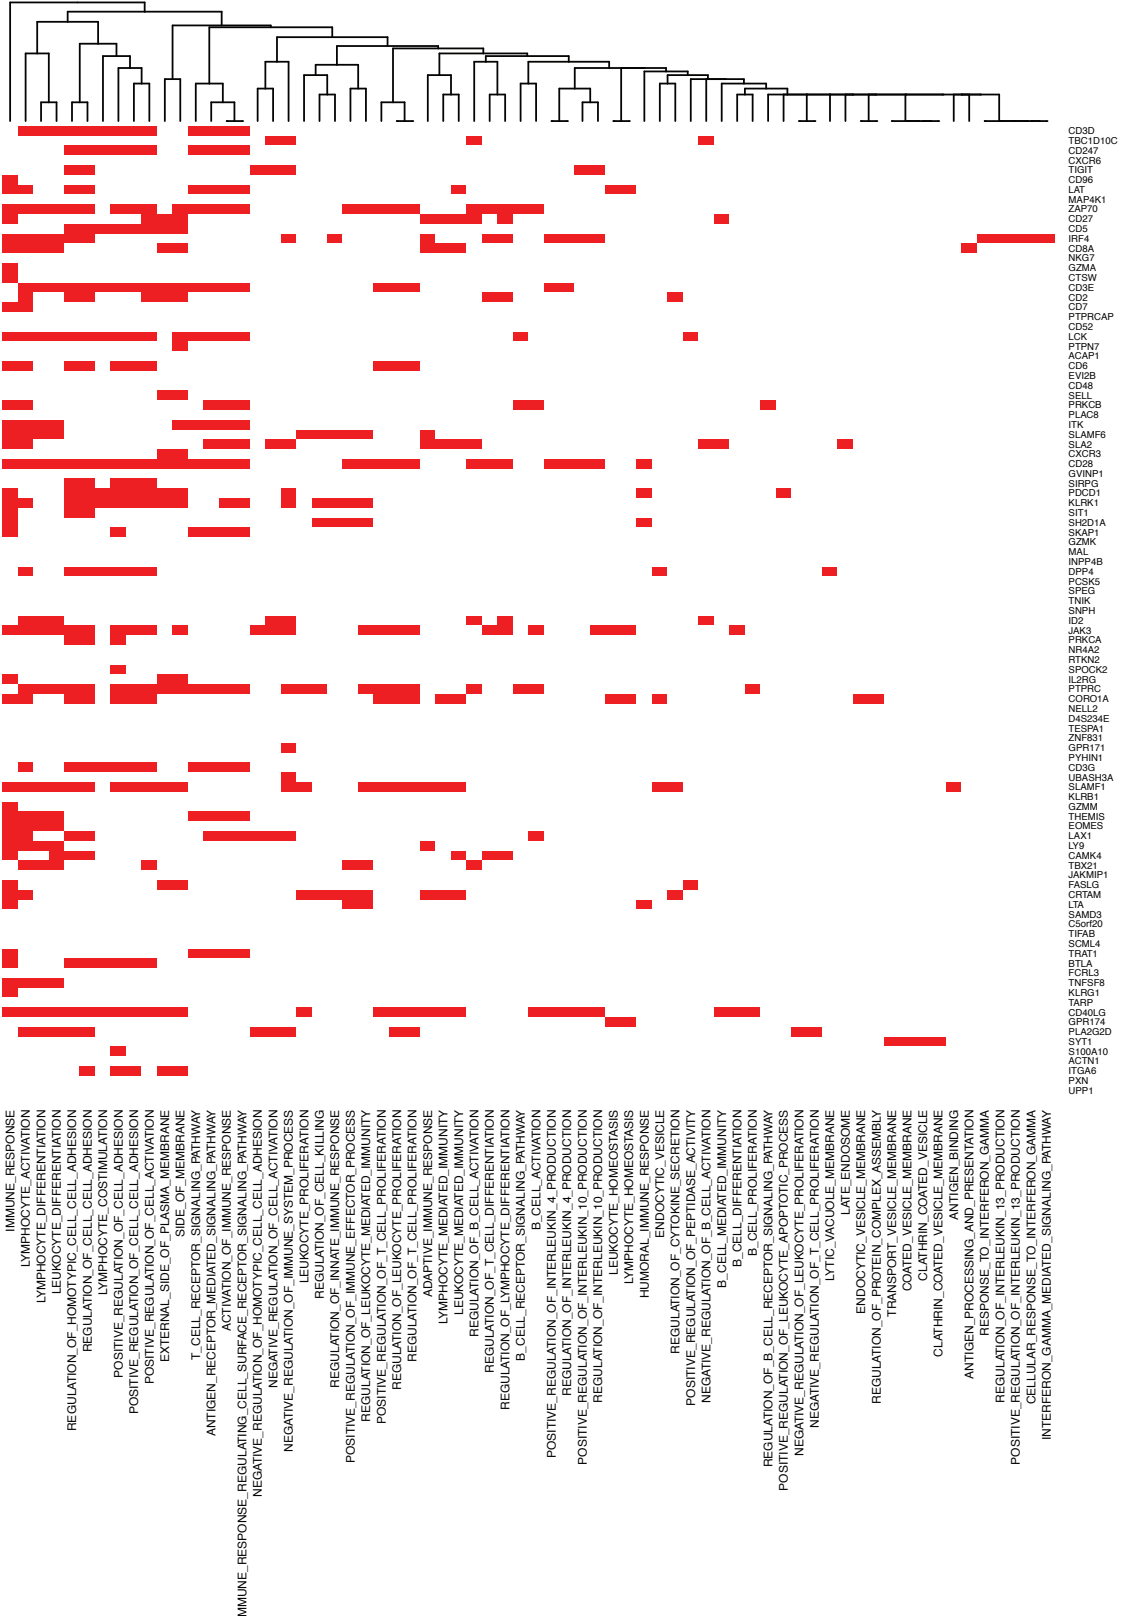

Supplementary Figure 5: The gene ontology (GO) annotation of differentially expressed T-Cell genes in HPV-positive and negative tumors of Fig. 3.

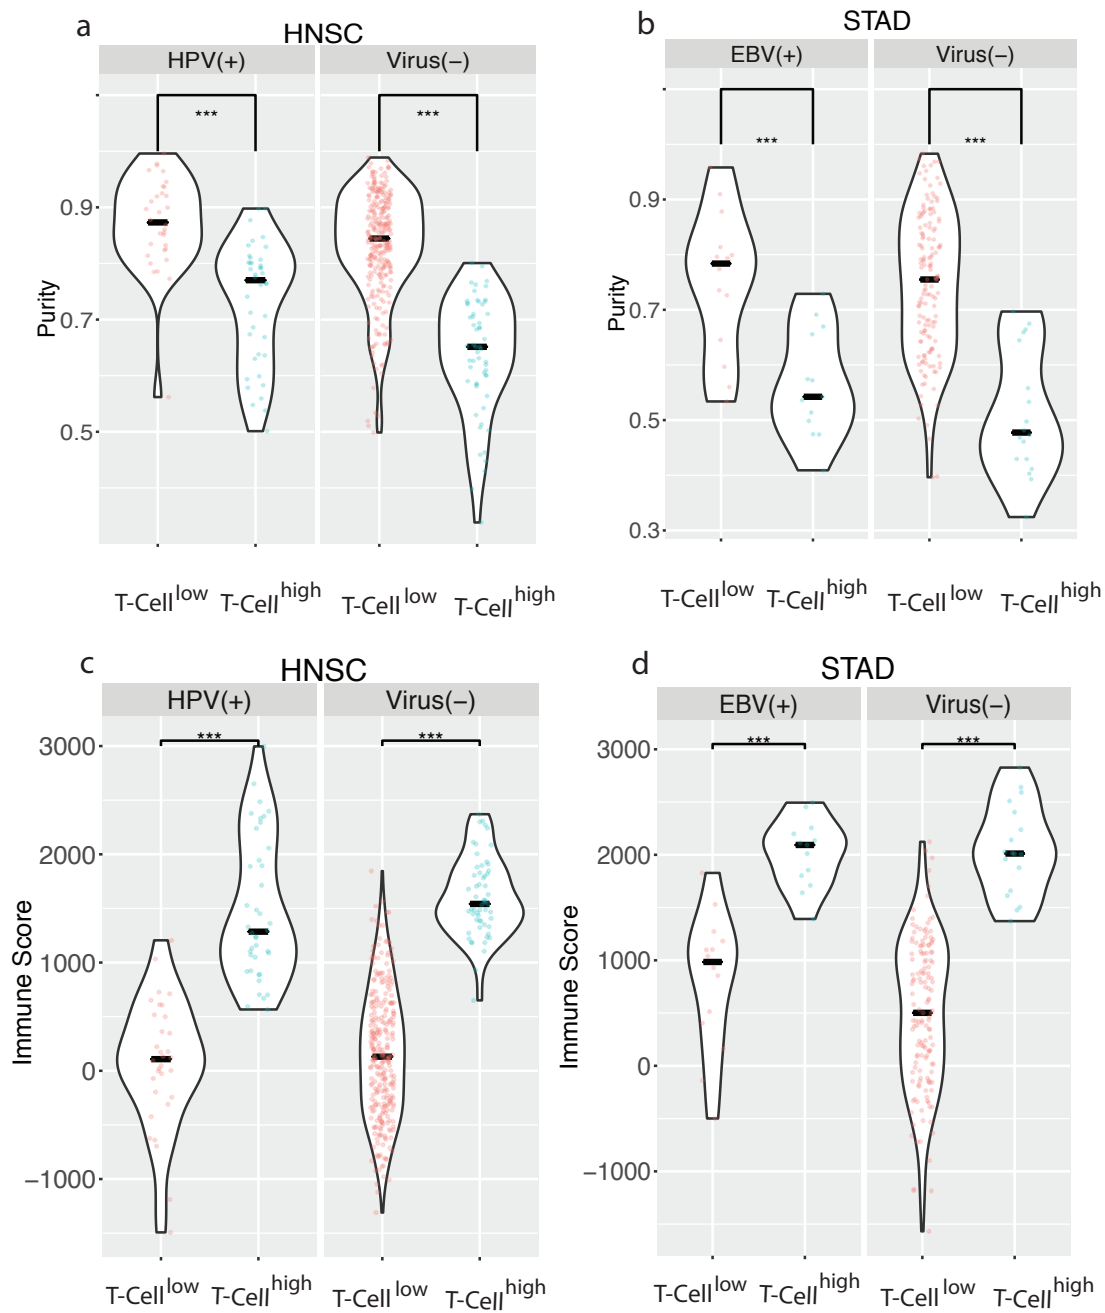

Supplementary Figure 6: The comparison of tumor purity and immune score between T-Cell high and T-Cell low samples.

# HPV-related B-Cell immune response in HNSC

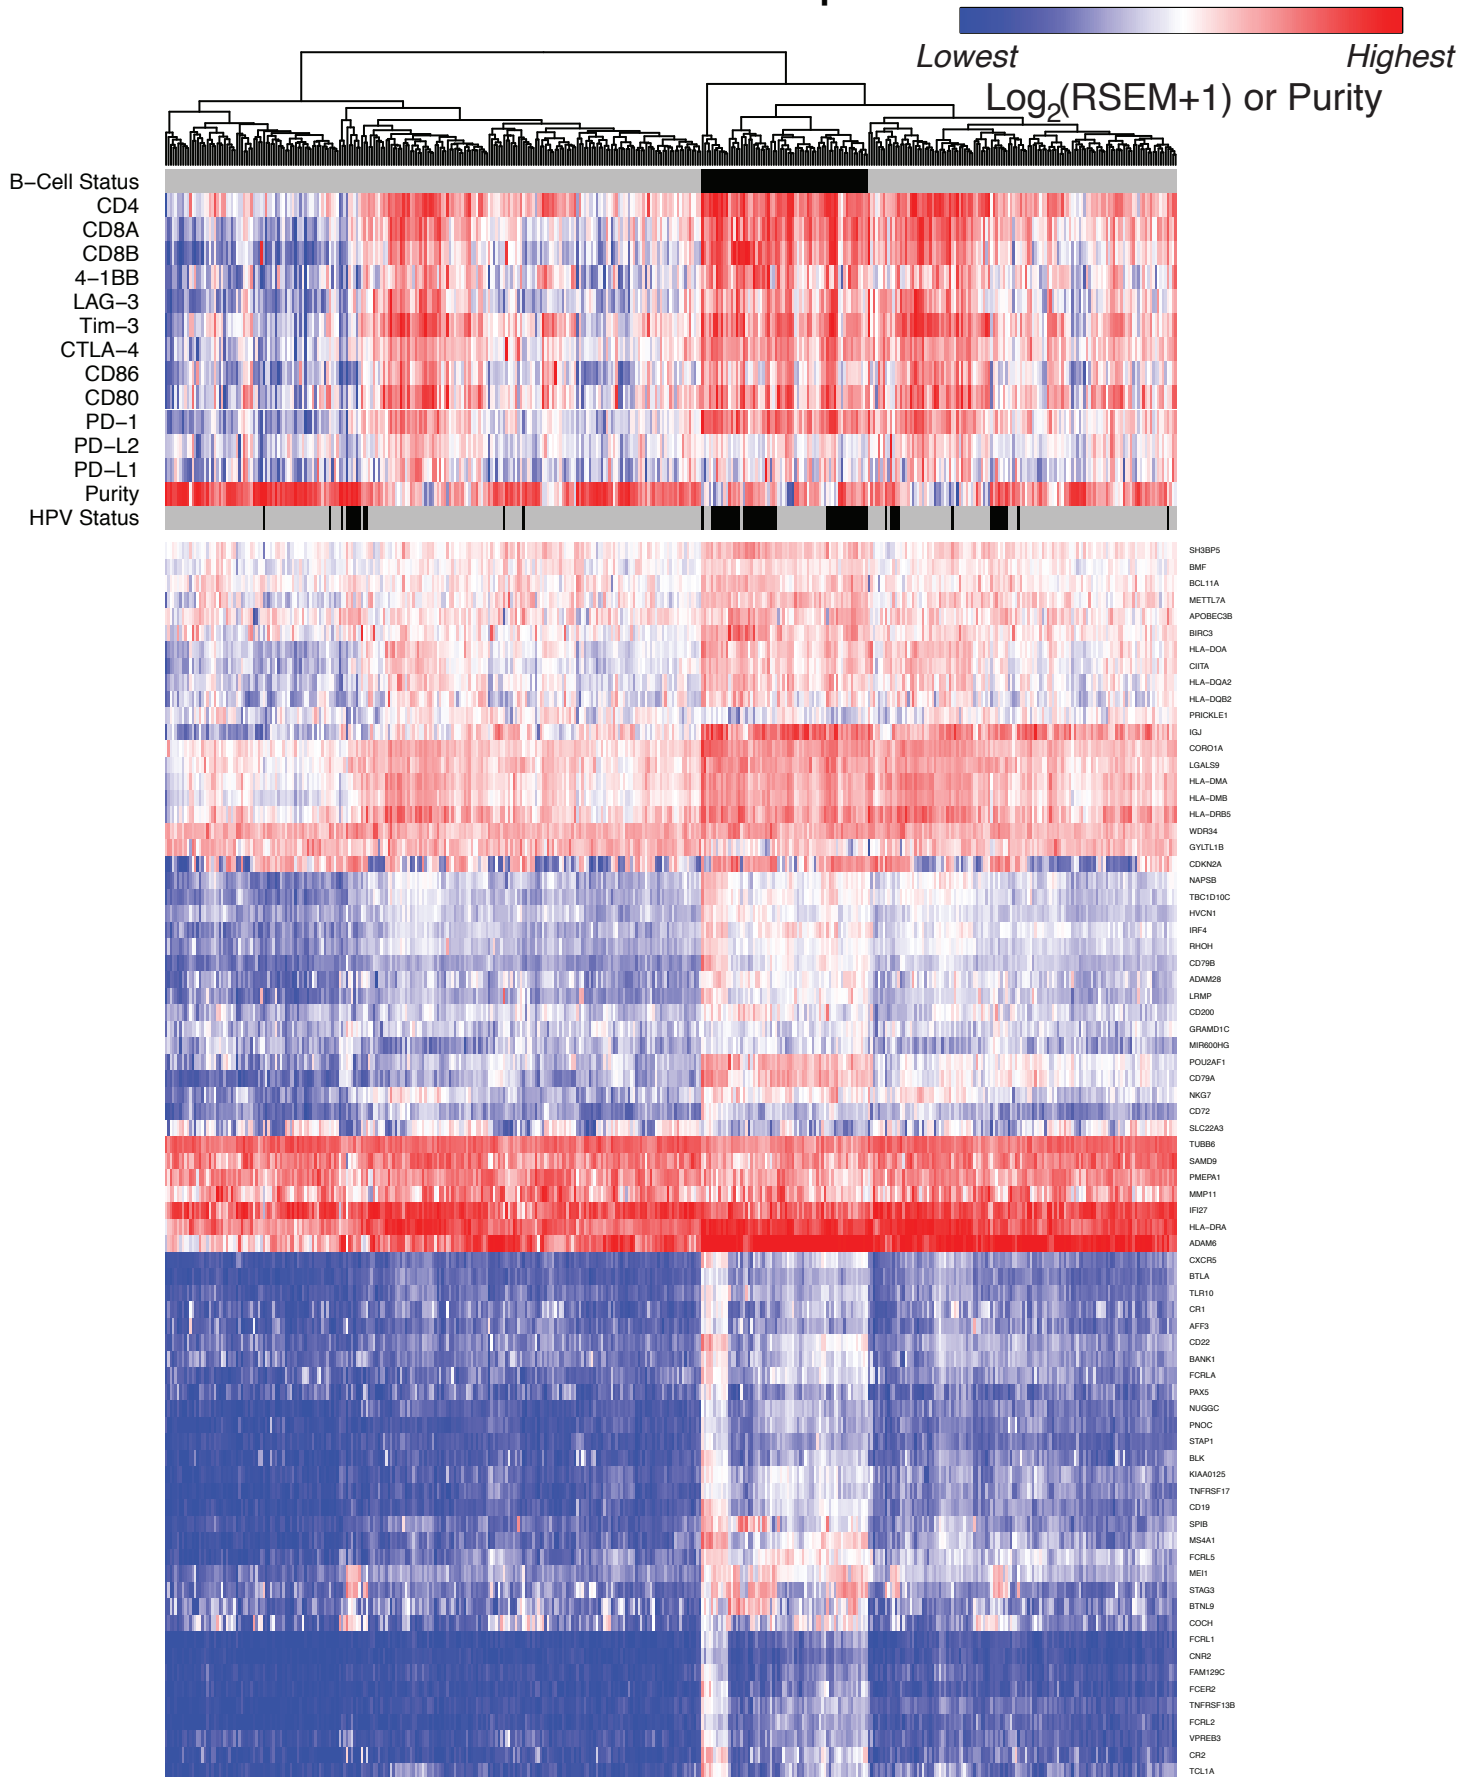

Supplementary Figure 7: The supervised cluster of B-Cell significant genes for HPV-positive and virus-negative HNSC samples.



# EBV-related B-Cell immune response in STAD

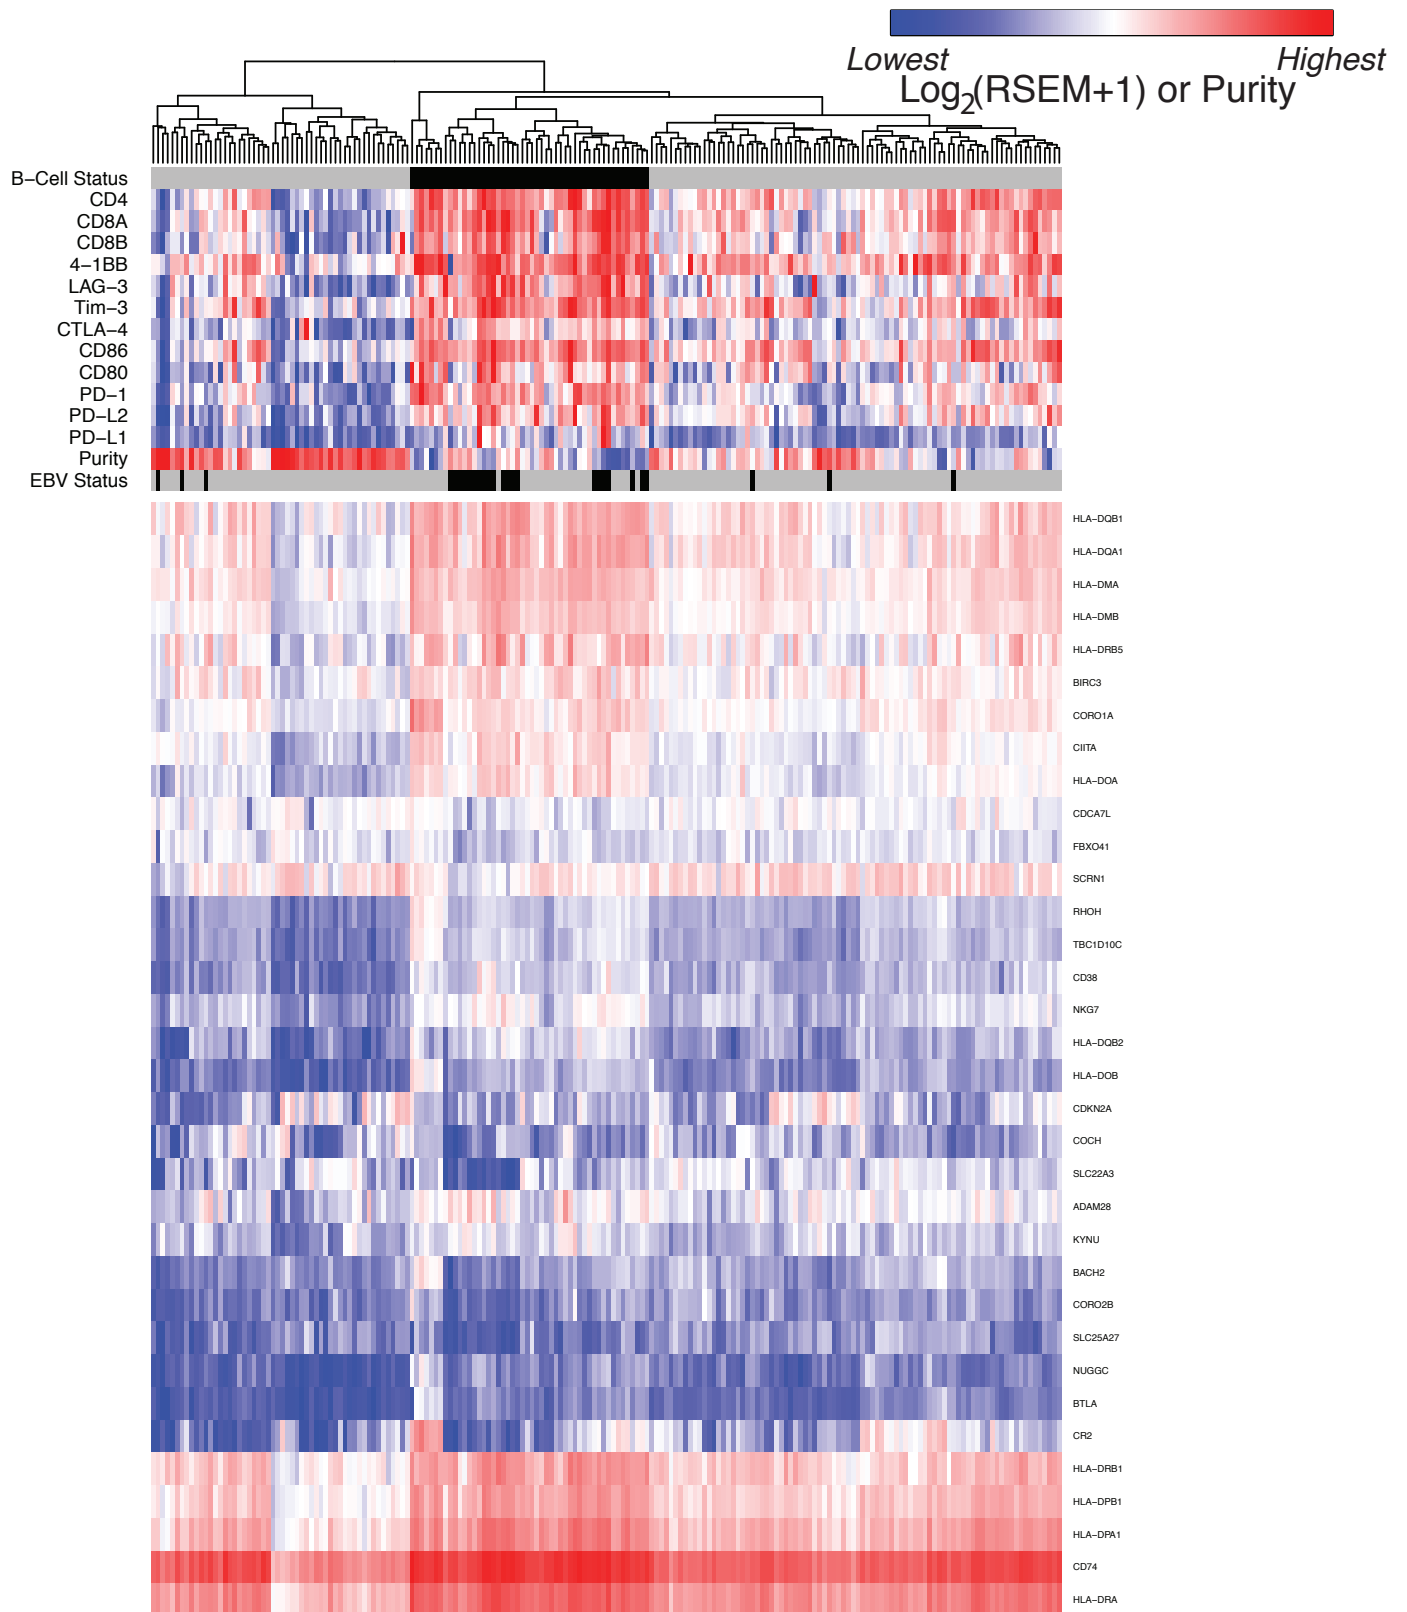

Supplementary Figure 9: The supervised cluster of B-Cell significant genes for EBV-positive and virus-negative STAD tumors.

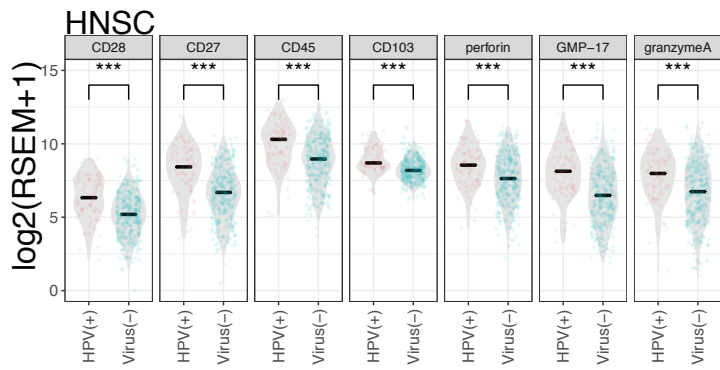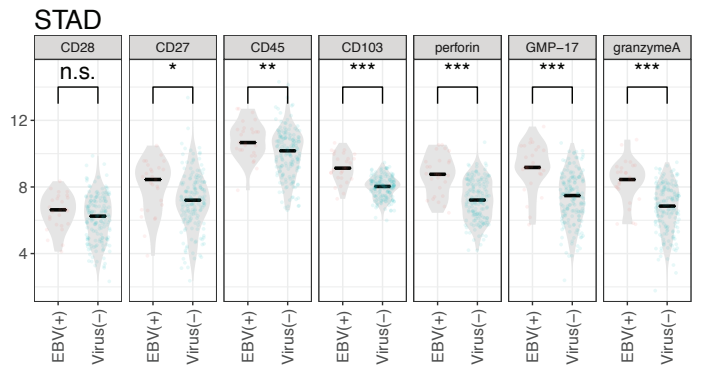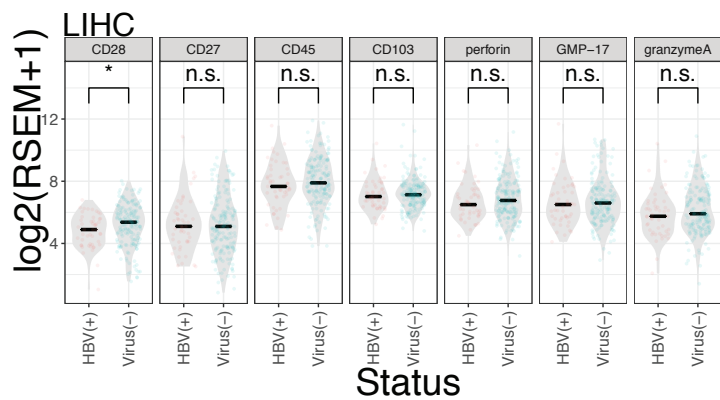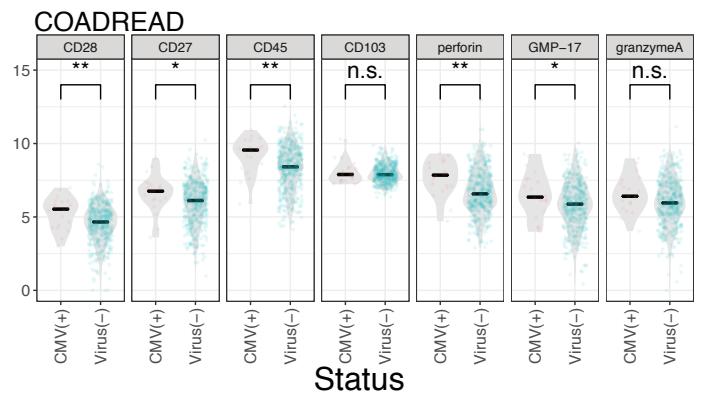

Supplementary Figure 10: The comparison of expressions of *CD28*, *CD27*, *CD45*, *CD103*, *perforin*, *GMP-17*, and *granzymeA* between different virus-positive and negative tumors.

# HPV-related T-Cell immune response in CESC

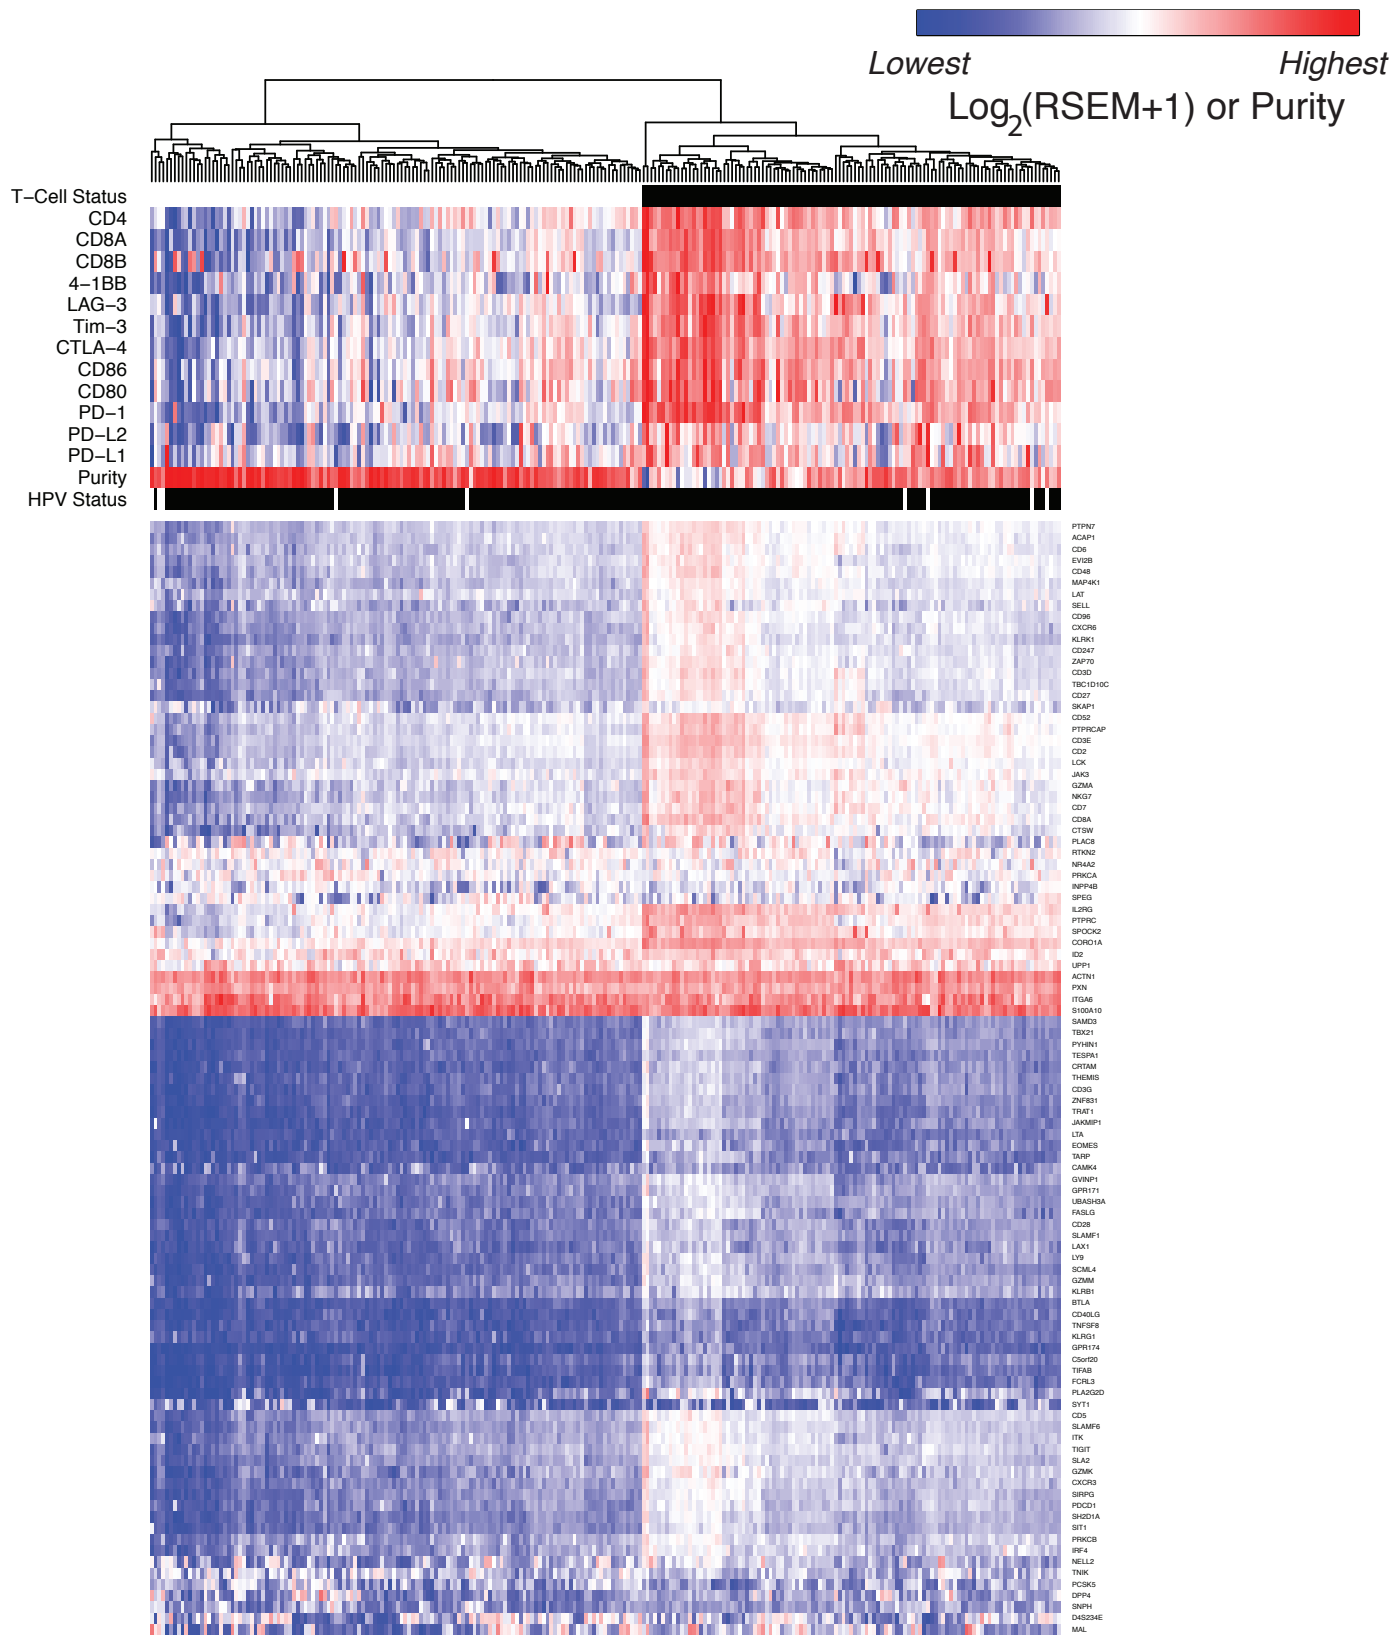

Supplementary Figure 11: The clustering of T-Cell high and T-Cell low tumors in CESC based on the T-cell signature found in HPV-positive HNSC tumors.

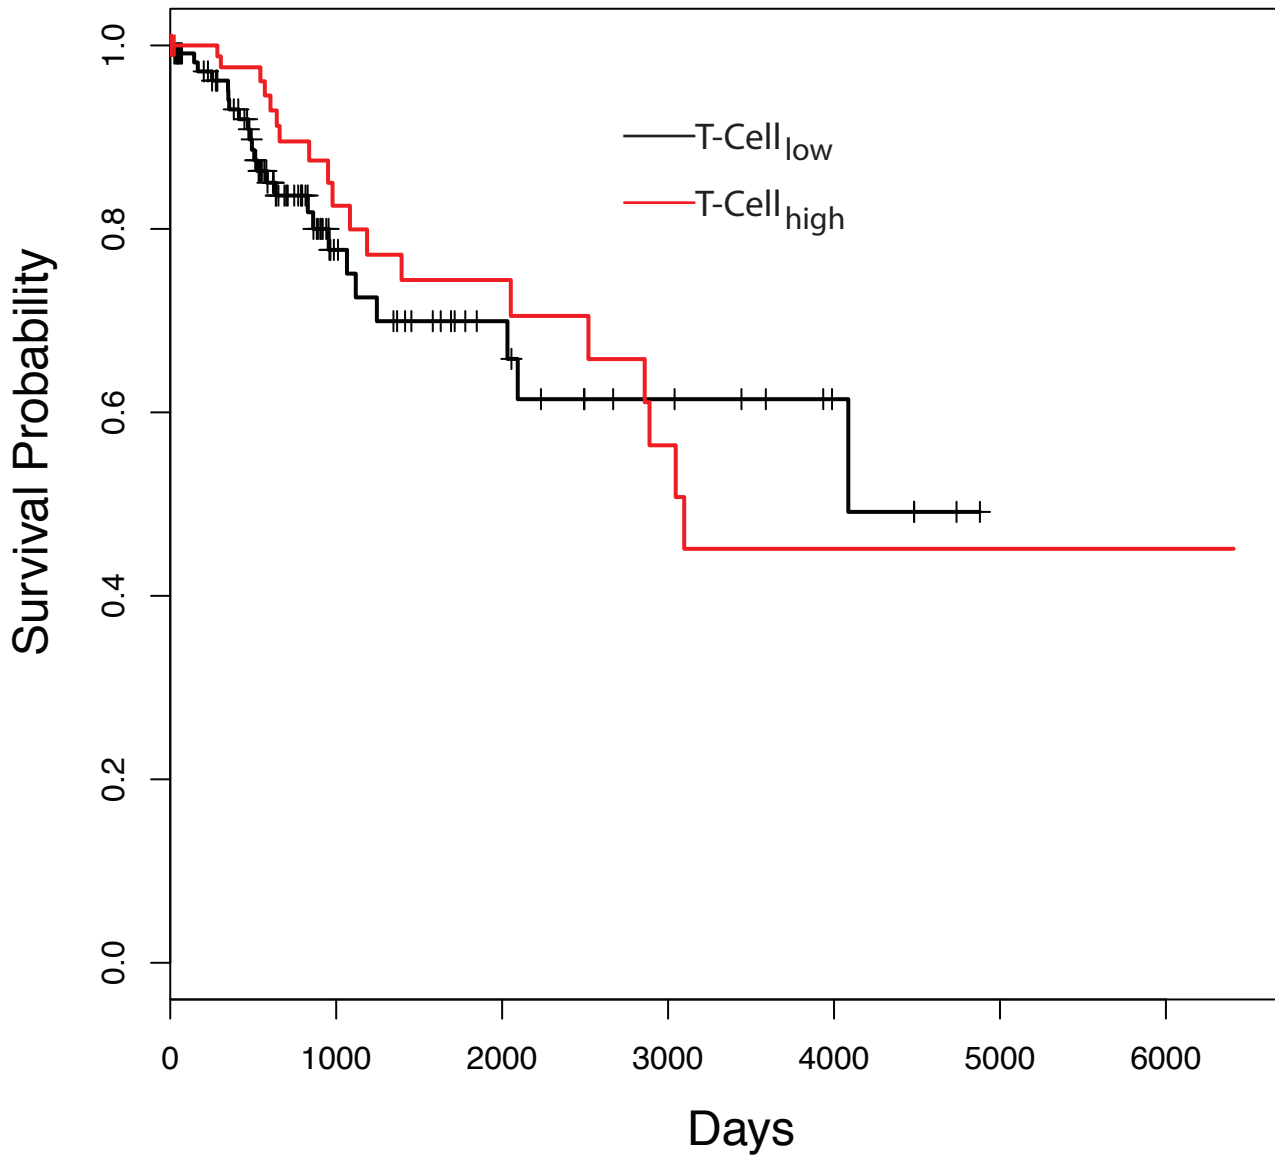

Supplementary Figure 12: The comparison of overall survival in T-Cell high and T-Cell low tumors in HPV-positive CESC tumors.



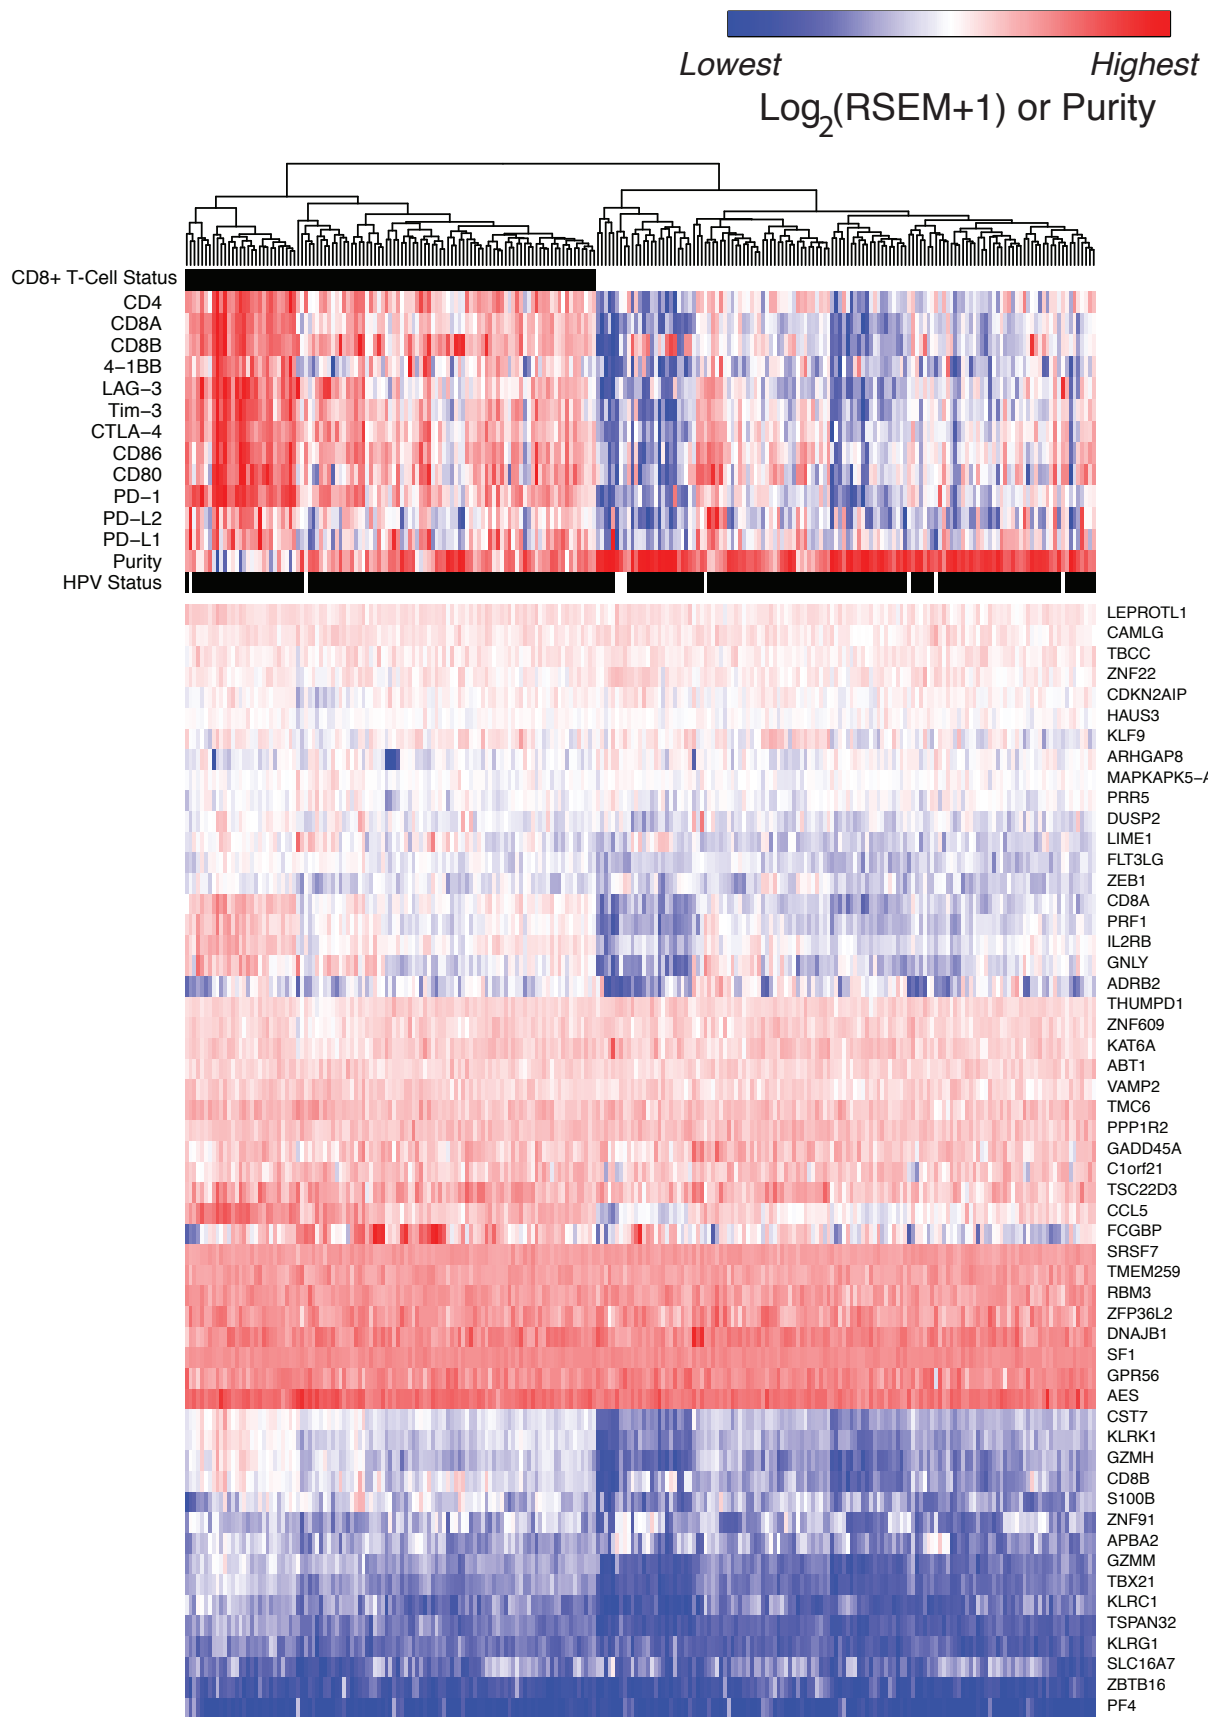

Supplementary Figure 13: Unsupervised clustering of CESC tumors based on CD8+ T-Cell genes.

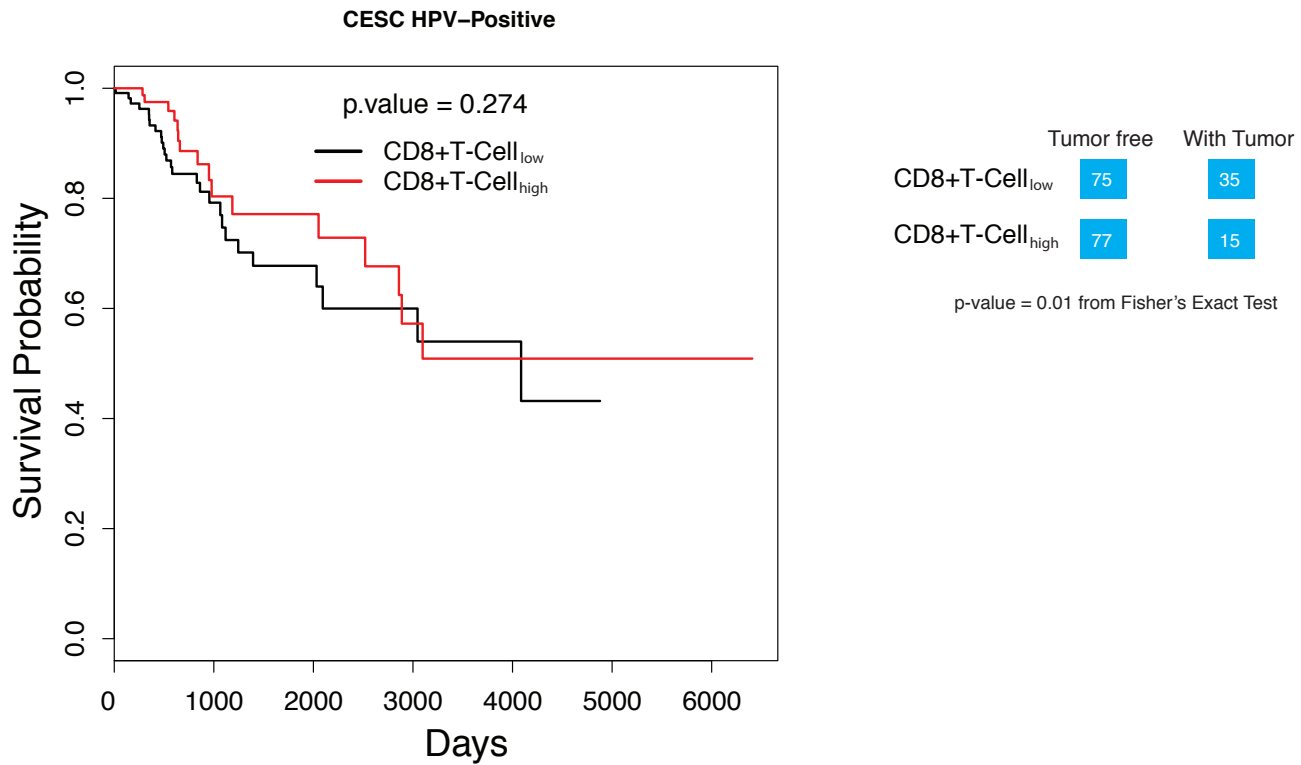

Supplementary Figure 14: The comparison of overall survival in CD8+T-Cell high and CD8+T-Cell low samples in HPV-positive CESC samples. In the right panel, we showed the number of samples with “Tumor free” and “With Tumor”. Tumors with CD8+T-Cell high status have a high chance of “Tumor free” status in the following check-ups (p-value = 0.01).

**a**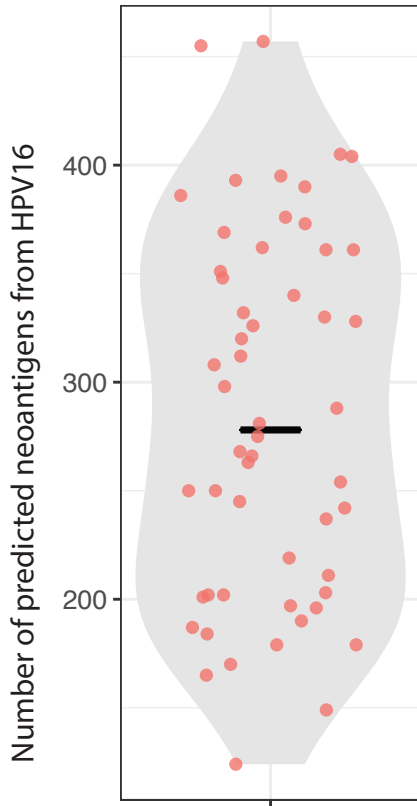**b**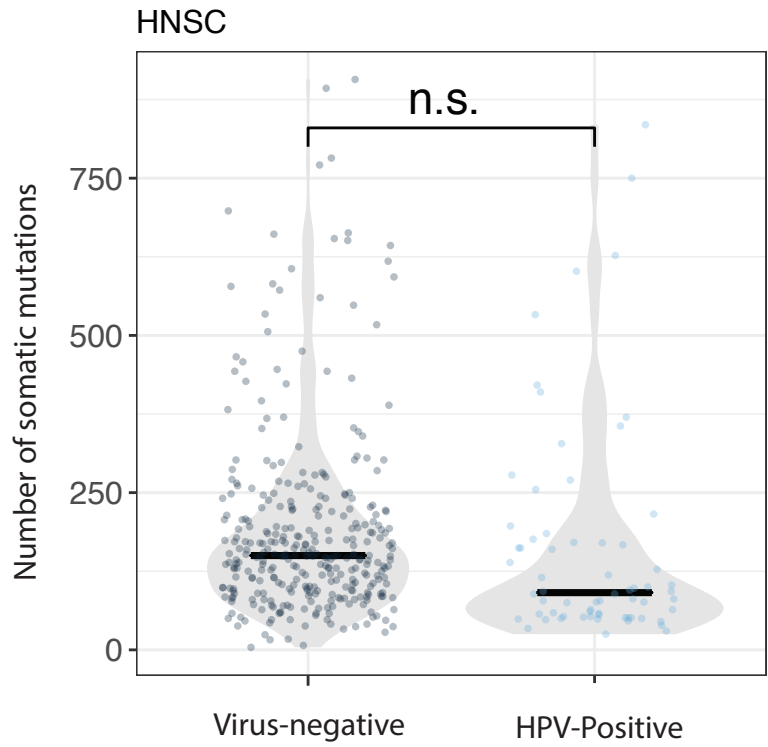

Supplementary Figure 15: (a) Number of predicted neoantigens from HPV16 across different HPV16-positive HNSC tumors. HPV16 is the dominant HPV subtype which can be found in 84% of HPV-positive HNSC tumors. (b) The comparison of mutational burden in HPV-positive and virus-negative tumors.

**Supplementary Table 1: The association between virus status, sex and ethnicity.**

| HNSC           | MALE | FEMALE | p-value |
|----------------|------|--------|---------|
| HPV+           | 66   | 6      | 0.0002  |
| Virus negative | 244  | 97     |         |

| STAD           | MALE | FEMALE | p-value |
|----------------|------|--------|---------|
| EBV+           | 23   | 4      | 0.005   |
| Virus negative | 91   | 72     |         |

| LIHC           | MALE | FEMALE | p-value |
|----------------|------|--------|---------|
| HBV+           | 41   | 8      | 0.0034  |
| Virus negative | 104  | 66     |         |

| COADREAD       | MALE | FEMALE | p-value |
|----------------|------|--------|---------|
| CMV+           | 9    | 3      | 0.24    |
| Virus negative | 162  | 128    |         |

| HNSC           | CAUCASIAN | BLACK or AFRICAN AMERICAN | p-value |
|----------------|-----------|---------------------------|---------|
| HPV+           | 69        | 3                         | 0.32    |
| Virus negative | 295       | 27                        |         |

| STAD           | CAUCASIAN | ASIAN | p-value |
|----------------|-----------|-------|---------|
| EBV+           | 16        | 9     | 0.82    |
| Virus negative | 93        | 48    |         |

| LIHC           | CAUCASIAN | ASIAN | p-value |
|----------------|-----------|-------|---------|
| HBV+           | 2         | 42    | 0.0001  |
| Virus negative | 142       | 16    |         |

| COADREAD       | CAUCASIAN | BLACK or AFRICAN AMERICAN | p-value |
|----------------|-----------|---------------------------|---------|
| CMV+           | 11        | 0                         | 0.22    |
| Virus negative | 216       | 41                        |         |

## Supplementary Table 2: The T-Cell and B-Cell gene list

**T-Cell:** AAK1 ACAP1 ACTN1 ACVR2B ADA AMICA1 ANXA1 APBA2  
 SPEG APOE AQP3 ARL4C ATP1A1 BAG3 BCL11B BIN2 BTLA  
 BUB1B C16orf54 RNF213 C20orf112 C5orf20 CAMK4 CCL5  
 CCND2 CCR2 CD2 CD247 CD27 CD28 CD38 CD3D CD3E  
 CD3G CD40LG CD48 CD5 CD52 CD53 CD6 CD7 CD8A  
 CD96 CDC14A CDC25B CDR2 CISH COR01A CRTAM CST7 CTLA4  
 CTSW CXCL9 CXCR3 CXCR6 D4S234E NBPF14 DNAJB1 DNASE1L3  
 DOCK9 DPP4 ARID3A NAP1L5 DUSP16 DUSP2 LPAR2 FAM102A EOMES  
 LIMA1 TMC6 EVI2B FASLG FBLN5 FCRL3 FHIT MAP7D1 DNAJC17  
 FAM134B MORC2-AS1 FLT3LG AKTIP FYB FYN GABARAPL1  
 GALT GATA3 GBP1 GBP2 GFI1 GIMAP2 GIMAP4 GIMAP5 GPR171  
 GPR174 GPM3 GVINP1 GZMA GZMK GZMM HOXB2 HSPA1L ICOS  
 ID2 IFITM1 IL10RA IL18R1 IL2RG IL6R IL6ST IL7R INPP4A  
 INPP4B IRF4 ITGA6 ITK ITM2A ITPKB JAK3 ARHGAP25  
 TESPA1 KLRB1 KLRG1 KLRK1 LAPTM5 LAT LAX1 LCK LCP2  
 LCP:7125 LDHA LDHB LEF1 LEPROTL1 LINC00426  
 LOC112868 LOC283666 LOC340061 LPIN2 LRIG1 LTA  
 LTBP4 LY9 LYAR MAL MAN1C1 MAP4K1 MAPKAPK5 JAKMIP1  
 MAST4 MATN2 MEN1 PIK3IP1 SLFN5 COA5 MLLT3 MPP7 MYBL1  
 NCALD NELL2 NGFRAP1 IL32 NKG7 NPDC1 NPTXR NR4A2 OPTN  
 LPAR6 PAG1 PCSK5 PCYT2 PDCD1 PDE4D PDE9A PIK3R1 PIM1  
 PKM PLA2G2D PLAC8 RTKN2 PLXDC1 PRF1 PRKCA PRKCB PRKCI  
 PRKCQ PSTPIP1 PTGER2 PTPN7 PTPRC PTPRCAP PXN PYHIN1 RAB43  
 RARRES3 RASGRP1 RBMS1 RGS10 GIPC1 RNF144A RORA RUNX2 S100A10  
 S100A8 S1PR4 SAMD3 SAMSIN1 SATB1 SCML4 SELL SELPLG SEMA4D  
 TSEN54 SH2D1A SHFM1 SIRPG SIT1 SKAP1 SLA2 SLAMF1 SLAMF6  
 SLAMF7 SLC03A1 SLC35D2 SLC39A8 SNPH SOCS3 SORL1 SP140 SPOCK2  
 STAT4 SYNE2 SYT1 TACC3 TARP TBC1D10C TBX21 TCF7  
 TRAT1 OLAH THEMIS TIAM1 TIFAB TIGIT TSPAN14 TNFAIP3  
 TNFRSF25 TNFSF8 TNIK TOB1 TRA TRB TRBC1 TRERF1  
 CEP41 TXK UBASH3A UPP1 VIPR1 LINS WNT10B WWP1 ZAP70  
 ZNF831

**B-Cell:** ABCA1 ABCB4 ACTA2 ADAM19 ADAM28 ADAM6 ADK  
 ADRBK2 AIM2 ALOX5 AMFR ANXA4 ATG4A APOBEC3B  
 ARHGAP10 ARHGEF3 ATP5B ATP6V0A1 BACE2 BACH2 BANK1  
 BCL11A BCL7A FAM129C BIRC3 BLK BLNK CXCR5 BMF BMS1P20  
 BRD4 STAP1 BSG BTK BTNL9 C11orf24 KIAA0226L  
 MGME1 GUCD1 CCDC50 CCNG2 CCR9 CD19 CD1C CD1D MS4A1  
 CD200 CD22 CD24 CD72 CD74 CD79A CD79B CD83 CD86  
 CDKN2A CEBPB CHD7 CHERP PLEKH01 CLIC4 CNR2 COCH COL14A1  
 COPS3 COR01C COR02B CR1 CR2 CTSH CTSZ CYB561D2  
 CYB561A3 CYBB CYSLTR1 DAPP1 DDR1 METTL7A GRAMD1C DMXL1  
 DTNB DTX1 E2F5 EBF1 UBR5 EGR1 EPB41L2 EPHX1 DNAJC10  
 EVI5L F5 KIAA0125 FBX010 FBX041 FCER2 FCGR2B FCRL1  
 FCRL2 FCRL5 FCRLA FGD2 FLII ZNF532 CCDC25 VPS53 SNX29

|           |         |           |          |           |          |           |             |          |
|-----------|---------|-----------|----------|-----------|----------|-----------|-------------|----------|
| TCTN1     | RALGPS2 | FOXP1     | FUBP1    | FZD5      | RAP1GAP2 | GCNT1     |             |          |
| MIR600HG  |         | GLDC      | GM2A     | GNA12     | GNG7     | GSTZ1     | GYLTL1B     | HECW2    |
| HERPUD1   | HHEX    | HIST1H2BK |          | HLA-DMA   | HLA-DMB  | HLA-DOA   | HLA-DOB     | HLA-     |
| DPA1      |         | HLA-DPB1  |          | HLA-DQA1  |          | HLA-DQA2  |             | HLA-DQB1 |
| HLA-DQB2  |         | HLA-DRA   | HLA-DRB1 |           | HLA-DRB5 |           | HLA-DRB6    |          |
| HRK       | HSPA5   | HSPA6     | SSU72    | PPAPDC1B  |          | IFI27     | IFIT3       | IFNGR2   |
| IGH       | IGHA1   | IGHD      | IGHG1    | IGHG3     | IGHM     | IGJ       | IGKC        | IGKV1-5  |
| IGKV1D-13 |         | IGL       | IGLC2    | IGLJ3     | IGLL1    | IGLL3P    | IL4R        | INPPL1   |
| IRF8      | ITGB1   | ITPR1     | KDM4B    | JUP       | FIG4     | DENND4B   | SEL1L3      | KAZN     |
| RALGAPB   | KLF1    | KLHL14    | KYNU     | AFF3      | LCP:21   | LGALS9    | LHFPL2      |          |
| LOC201895 |         | LOC283663 |          | LOC339562 |          | LOC348938 |             |          |
| LOC388078 |         | LOC391427 |          | LOC440871 |          | LOC51760  |             | GSAP     |
| LOC57228  |         | LOC91316  |          | LOC92497  |          | LRMP      | CD180       | LY86     |
| LYN       | MAP3K8  | 1-Mar     | MARCKS   | MEF2C     | MEI1     | HVCN1     | DENND5B     |          |
| MGC27165  |         | TSPAN33   | DRAM2    | CIITA     | MICAL3   | RCSD1     | MMP11       | MOB3B    |
| MRPL49    | MTPN    | MTSS1     | MYBL2    | MYO1E     | NAP1L    | NAPSB     | NCF1        | NCF4     |
| TSPAN9    | NFKBIE  | NUGGC     | NUP88    | ODC1      | OSBPL10  | PACAP     | PALM2-AKAP2 |          |
| PARP14    | PAX5    | PCCA      | PEA15    | PHF16     | PIK3AP1  | PIK3C2B   | PLCG2       | PLEKHF2  |
| PMAIP1    | PNOC    | POLD4     | POU2AF1  | POU2F2    | PPP3CA   | PRCP      | PRICKLE1    |          |
| PRKCE     | CYTH1   | PSEN2     | WDR830S  | QRSL1     | RAB30    | CDCA7L    | RFX5        | RGS13    |
| RHOBTB2   | RHOH    | RIPK2     | RNASE6   | RNF141    | USP6NL   | RRAS2     | SAMD9       | TSPAN31  |
| SAV1      | SKAP2   | SCN3A     | SCRN1    | SEMA4B    | SETBP1   | SH3BP5    | SHMT2       | SIDT2    |
| SLC15A2   | SLC22A3 | SLC2A1    | SLC2A5   | SLC7A7    | SMAD3    | SMC6      | SNX10       | SNX2     |
| SPI1      | SPIB    | SRGAP2    | SSPN     | ST14      | STAG3    | STAT6     | STRBP       | STX7     |
| SWAP70    | SYK     | SYNGR2    | SYPL1    | TBC1D1    | TCF4     | TCL1A     | TEAD2       | TNS3     |
| TFEB      | TLR10   | TLR7      | TSPAN3   | TMED8     | PMEP1A   | TNFRSF13B |             |          |
| TNFRSF17  |         | TNFRSF18  |          | TPD52     | TRIM26   | TRIM56    | TRIO        | TTC7A    |
| TUBB6     | UBE2J1  | SLC25A27  |          | SUN2      | HUWE1    | UROS      | UVRAG       | VPREB3   |
| VPS28     | WIPF1   | WDR11     | WDR34    | WEE1      | XYLT1    | ZCCHC7    | ZNF154      | ZNF207   |
